# Supplementary material
Source: PubMed Central journal article supplement (PMC3382506)
Supplement: 1203563109_pnas.201203563SI.pdf [file 1203563109_pnas.201203563SI.pdf]

# Supporting Information

Schjoldager et al. 10.1073/pnas.1203563109

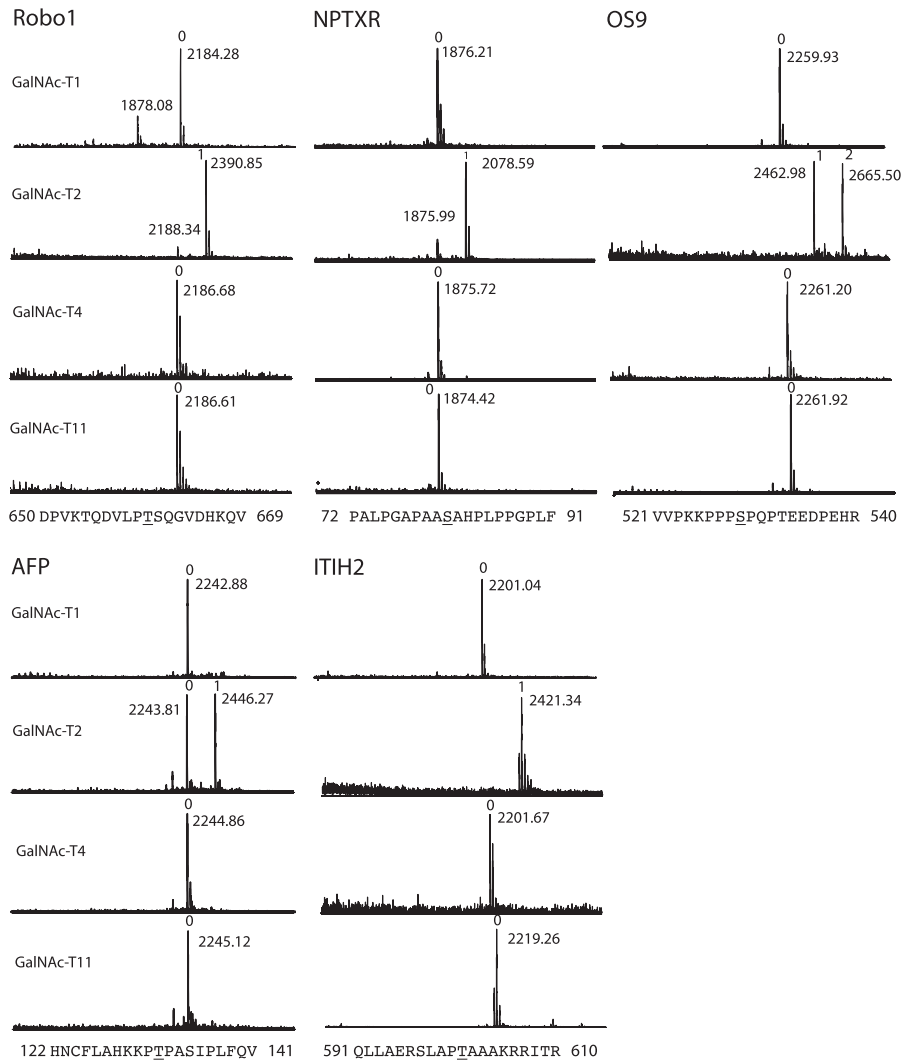

**Fig. S1.** MALDI-TOF time-course analysis of in vitro enzyme assays with selected GalNAc-T2 candidate peptide substrates (ROBO1, NPTXR, OS9, AFP, and ITIH2) by GalNAc-T1, -T2, -T4, and -T11. Synthetic peptides were designed to cover identified glycosylated Ser or Thr residues (underlined). Reactions were analyzed after a 16-h incubation. Masses of peptides and glycopeptides are indicated with the predicted number of incorporated GalNAc residues written above the peaks.

## Other Supporting Information Files

[Table S1 \(DOCX\)](#)
